# Supplementary material
Source: PubMed Central journal article supplement (PMC5233443)
Supplement: NIHMS6400-supplement-Pal_2012_Diabetol_Supp_1.pdf [file NIHMS6400-supplement-Pal_2012_Diabetol_Supp_1.pdf]

a

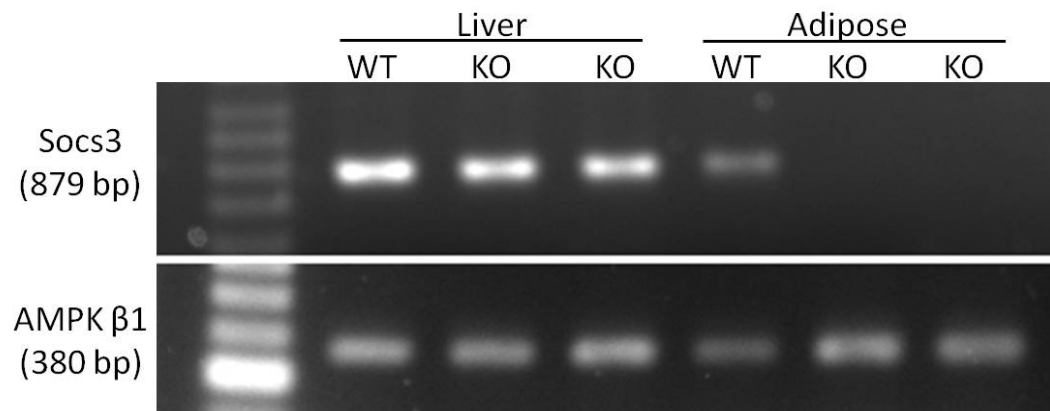

b

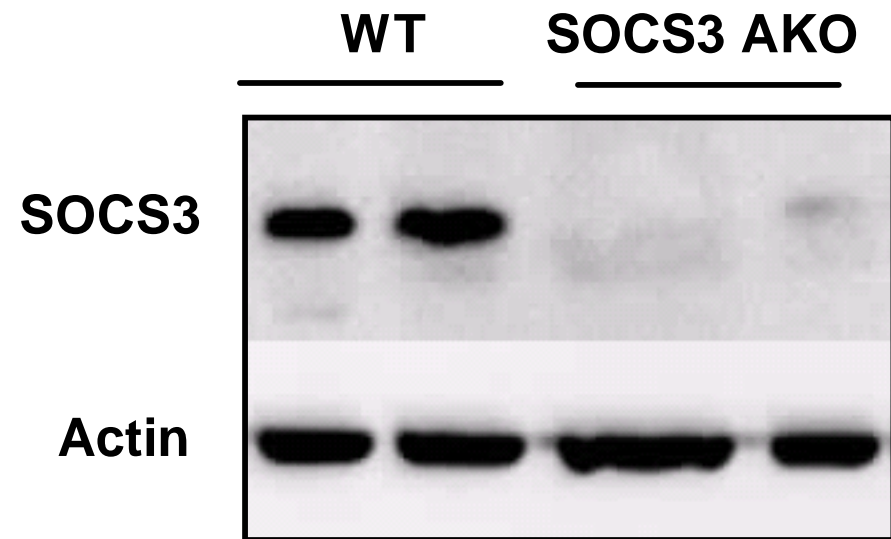

**ESM Fig. 1.** (a) SOCS3 genomic DNA expression in liver and white adipose tissue of WT and SOCS3 AKO mice injected with LPS. (b) SOCS3 protein and beta-actin expression in white adipose tissue from WT and SOCS3 AKO mice injected with LPS.
