# Supplementary material
Source: PubMed Central journal article supplement (PMC5233443)
Supplement: NIHMS6400-supplement-Pal_2012_Diabetol_Supp_2.pdf [file NIHMS6400-supplement-Pal_2012_Diabetol_Supp_2.pdf]

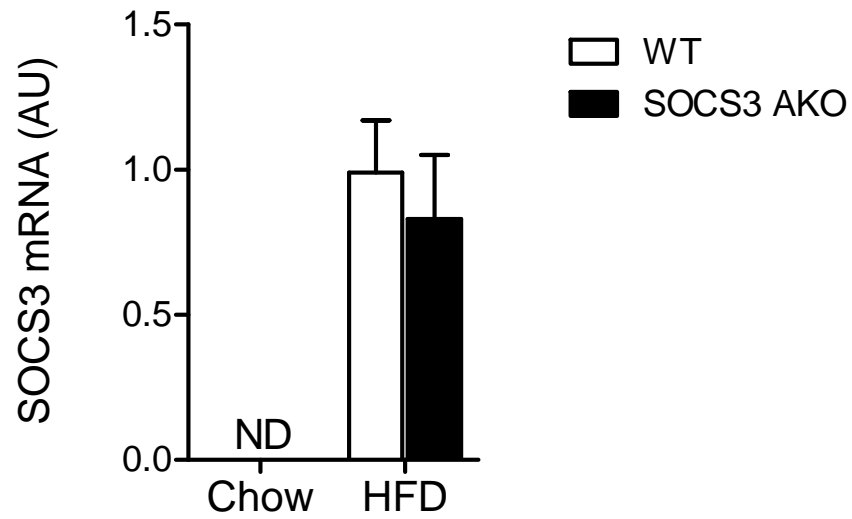

**ESM Fig. 2.** SOCS3 mRNA expression in adipose tissue macrophages from WT and SOCS3 AKO mice fed a HFD for 16-weeks. Due to the small amounts of adipose tissue in chow-fed female mice it was not possible to obtain adipose tissue macrophages from this group therefore ND=Not Determined. AU=Arbitrary Units. Data are mean  $\pm$  SEM, n=6.
