# Supplementary material
Source: PubMed Central journal article supplement (PMC5233443)
Supplement: NIHMS6400-supplement-Pal_2012_Diabetol_Supp_3.pdf [file NIHMS6400-supplement-Pal_2012_Diabetol_Supp_3.pdf]

**a**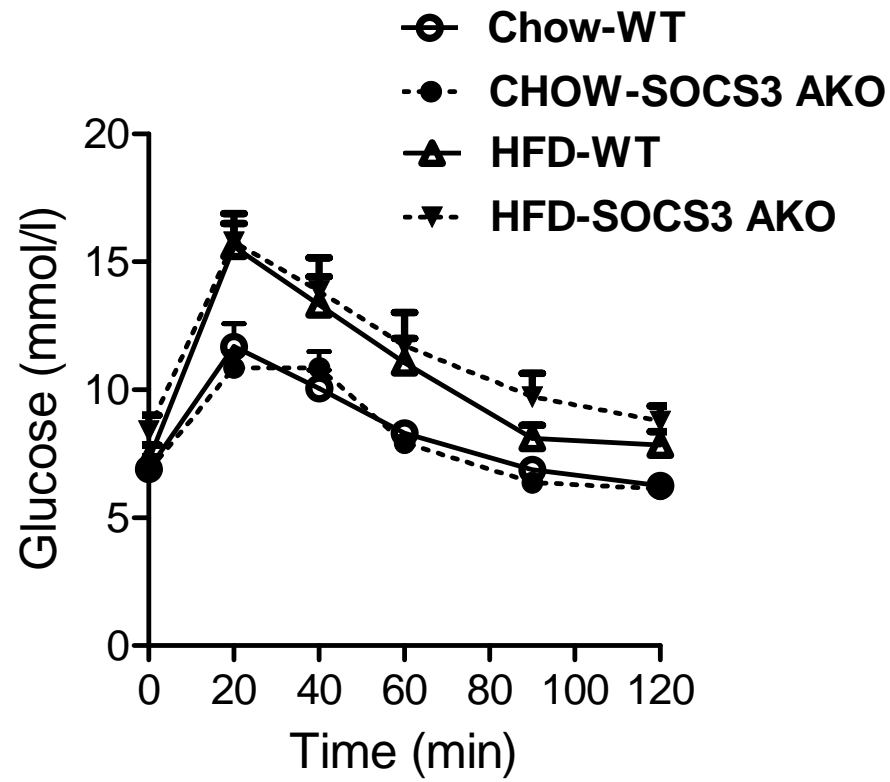**b**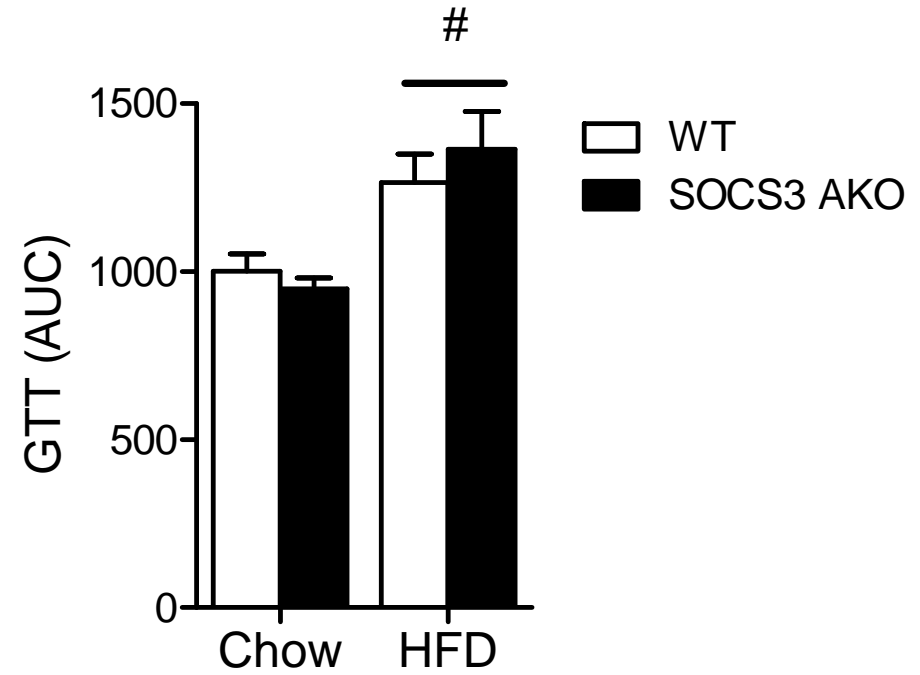

**ESM Fig. 3.** (a) Glucose tolerance (1 g/kg body mass) and (b) AUC (mmol/l x min) in male WT and SOCS3 AKO mice fed a chow or HFD for 16 wks. Data are mean  $\pm$  SEM, n=14-16. # $P$ <0.05 relative chow control.
